# Supplementary material for: Genetic Characterization of Sandfly-Borne Viruses in Phlebotomine Sandflies in Iran
Source: MDPI journal article supplement (doi:10.3390/microorganisms11112754), 2023-11-11
Supplement: s1 [file s1]

**Supplementary Table S1. Primers used for full-length sequencing of S gene of SBVs.**

|      | Primers | Sequence (5'→3')          | Product size (bp) |
|------|---------|---------------------------|-------------------|
| KARV | KARV-F1 | ACACAAAGCTTCCCTGAAATACA   | 779               |
|      | KARV-R1 | GCGGCTTTAAGCAAGAGAGC      | Tm 58.5-60        |
|      | KARV-F2 | ATTGACATGAACCTGAAGCCC     | 519               |
|      | KARV-R2 | GAGCCCAAGTCTGGAGGAGT      | Tm 58.5-60.1      |
|      | KARV-F3 | CATCGTGATCTTCTTATGGAGGGA  | 549               |
|      | KARV-R3 | CCTCCCTGCTTGATCACAATTC    | Tm 59.7-59.3      |
| TEHV | TEHV-F1 | AAGATTCCCGTTTACTAACTGACT  | 566               |
|      | THEV-R1 | AAGAGTCCATGGGCATCAGC      | Tm 57-60          |
|      | TEHV-F2 | AAGAGCCATGATGCATCCGA      | 858               |
|      | THEV-R2 | CCAAAGCCAACAATTCAATAGTCAT | Tm 58-59          |
| SFSV | SFSV-F1 | CCCAAACGATGAATAGCCAGT     | 737               |
|      | SFSV-R1 | CACCCATCGGGAGTTTCCAT      | Tm 58.3-59.5      |
|      | SFSV-F2 | CCTATCGGATGGATGACCCT      | 561               |
|      | SFSV-R2 | GCAATTCTGGATGCCACAAA      | Tm 58-59.7        |
|      | SFSV-F3 | CAATGTCTCTCTTGGAGGCC      | 621               |
|      | SFSV-R3 | ACACAAAGGTCCCTAGTTAATCTG  | Tm 58-60.4        |
